# Supplementary material for: A Paper-Based Multicolor Colorimetric Aptasensor for the Visual Determination of Multiple Sulfonamides Based on Aptamer-Functionalized Magnetic Beads and NADH–Ascorbic Acid-Mediated Gold Nanobipyramids
Source: MDPI journal article supplement (doi:10.3390/chemosensors11070386), 2023-07-09
Supplement: s1 [file s1]

# A Paper-Based Multicolor Colorimetric Aptasensor for the Visual Determination of Multiple Sulfonamides Based on Aptamer-Functionalized Magnetic Beads and NADH–Ascorbic Acid-Mediated Gold Nanobipyramids

Meiling Ping <sup>1</sup>, Wenchao Lv <sup>1</sup>, Chen Yang <sup>1</sup>, Qian Chen <sup>1</sup>, Zongwen Wang <sup>2,\*</sup> and Fengfu Fu <sup>1,\*</sup>

<sup>1</sup> Key Laboratory for Analytical Science of Food Safety and Biology of MOE, College of Chemistry, Fuzhou University, Fuzhou 350108, China

<sup>2</sup> State Key Laboratory of Ecological Pest Control for Fujian and Taiwan Crops, College of Plant Protection, Fujian Agriculture and Forestry University, Fuzhou 350002, China

\* Correspondence: fengfu@fzu.edu.cn (F.F.); 000q813035@fafu.edu.cn (Z.W.)

## 1. Chemicals and apparatus used in the experiments

Streptavidin-modified magnetic beads (~1.0  $\mu\text{m}$ , 10 g/L) were purchased from ThermoFisher Tech, Inc. (USA). Trihydroxymethyl aminomethane (Tris), sodium ethylenediamine tetraacetate (EDTA) and bovine serum albumin (BSA) were purchased from Sangon Biotech Co., Ltd. (Shanghai, China). Tris-HCl solution (1 M, pH 7.35–7.45), NaCl, KCl, Tween-20,  $\text{NaBH}_4$ ,  $\text{HAuCl}_4$ , cetyltrimethylammonium bromide (CTAB), hexadecyl trimethyl ammonium chloride (CTAC), silver nitrate ( $\text{AgNO}_3$ ), L-ascorbic acid and 2-phosphate trisodium salt (AAP) were obtained from Sigma-Aldrich Inc. of Chian (Shanghai, China). Streptavidin-modified alkaline phosphatase (Streptavidin-ALP) was purchased from Shanghai Biyuntian Biotechnology Co., Ltd. (Shanghai, China). Reduced nicotinamide adenine dinucleotide I (NADH) and HCl were purchased from Sinopharm Chemical Reagent Co., Ltd. (Shanghai, China). Nylon membranes (average pore size 0.2  $\mu\text{m}$ ) were obtained from Jinteng Experiment Equipment Co., Ltd (Tianjin, China).

UV-visible extinction spectra of AuNBPs were measured using a Spark 10 M multifunctional microplate reader (Tecan, Switzerland). All photographs were recorded using an EOS 600D digital camera (Canon, Japan). Transmission electron microscope (TEM) images were obtained using an HT7700 transmission electron microscope (Hitachi, Japan).

**Table S1:** Detailed DNA sequences used in the experiment

| DNA sequences |                                                                                                               |
|---------------|---------------------------------------------------------------------------------------------------------------|
| Aptamer       | 5'-AGA A C T T A C G A C A C G G G G T C T T G G G G T G A G T C C T G C T G T G T C A G T G T G T C G T A-3' |
| cDNA-1        | 5'-CCG T G T C G T A A G T T C T G T T T T T T T T -biotin-3'                                                 |
| cDNA-2        | 5'-biotin-T T T T T T T T T C A C T G A C A C A G C A G G-3'                                                  |

**Table S2:** Comparison of analytical performance among previous colorimetric aptasensors and our aptasensor for SA detection

| Analytical methods                                                                       | Detected SA kinds         | Linear range                 | Visual LOD            | Spectrometry LOQ      | Spectrometry LOD        | Color numbers  | Ref.      |
|------------------------------------------------------------------------------------------|---------------------------|------------------------------|-----------------------|-----------------------|-------------------------|----------------|-----------|
| Colorimetric aptasensor based on gold nanoparticles (AuNPs)                              | SDM                       | 0.16–3.2 $\mu\text{M}$       | N/A                   | 0.16 $\mu\text{M}$    | 0.05 $\mu\text{M}$      | single         | 1         |
| A dichromatic aptasensor based on AuNPs and fluorescent dyeing                           | SDM                       | 6.5–1.0 $\mu\text{M}$        | N/A                   | 6.5 $\mu\text{M}$     | 1.97 $\mu\text{M}$      | single         | 2         |
| Colorimetric aptasensor based on broad-specificity aptamer and dye displacement strategy | SQ, SMP, SMD, SCP and SPD | 0.5–100 $\mu\text{M}$        | 2.0–5.0 $\mu\text{M}$ | 0.5 $\mu\text{M}$     | 0.15 $\mu\text{M}$      | single         | 3         |
| Colorimetric method based on ZIF-8 nanozyme                                              | SMZ, ST and SDM           | 6.3–750 $\mu\text{M}$        | N/A                   | 6.3 $\mu\text{M}$     | 1.9 $\mu\text{M}$       | single         | 4         |
| Paper-based multicolor colorimetric aptasensor based on aptamer and gold nanobipyramids  | SQ, SMP and SMD           | 0.3–1.0 or 5.0 $\mu\text{M}$ | 0.3–1.0 $\mu\text{M}$ | 0.3–0.5 $\mu\text{M}$ | 0.09–0.15 $\mu\text{M}$ | multiple (> 8) | This work |

## References

1. Chen, A. L.; Jiang, X. L.; Zhang, W. W.; Chen, G.; Zhao, Y.; Tunio, T. M.; Liu, J. C.; Lv, Z. Z.; Li, C.; Yang, S. M. High sensitive rapid visual detection of sulfadimethoxine by label-free aptasensor. *Biosens. Bioelectron.* 2013, 42, 419–425.
2. Chen, X.-X.; Lin, Z.-Z.; Hong, C.-Y.; Yao, Q.-H.; Huang, Z.-Y. A dichromatic label-free aptasensor for sulfadimethoxine detection in fish and water based on AuNPs color and fluorescent dyeing of double-stranded DNA with SYBR Green I. *Food Chem.* 2020, 309, 125712.
3. Xu, R.-Y.; Yang, C.; Huang, L.; Lv W.-C.; Yang, W.-J.; Wu, Y.-N.; Fu F.-F. Broad-specificity aptamer of sulfonamides: isolation and its application in simultaneous detection of multiple sulfonamides in fish sample. *J. Agric. Food Chem.* 2022, 70, 11804–11812.
4. Chen, G.-Y.; Zhou, X.; Tian, T.; Zhang, C.-Y.; Yin, S.-J.; Chen, H.; Xu, Y.; Yang, F.-Q. Nanozyme based on ZIF-8 for the colorimetric detection of sulfonamides in cow milk. *Analytical Biochemistry* 2022, 652, 114748.

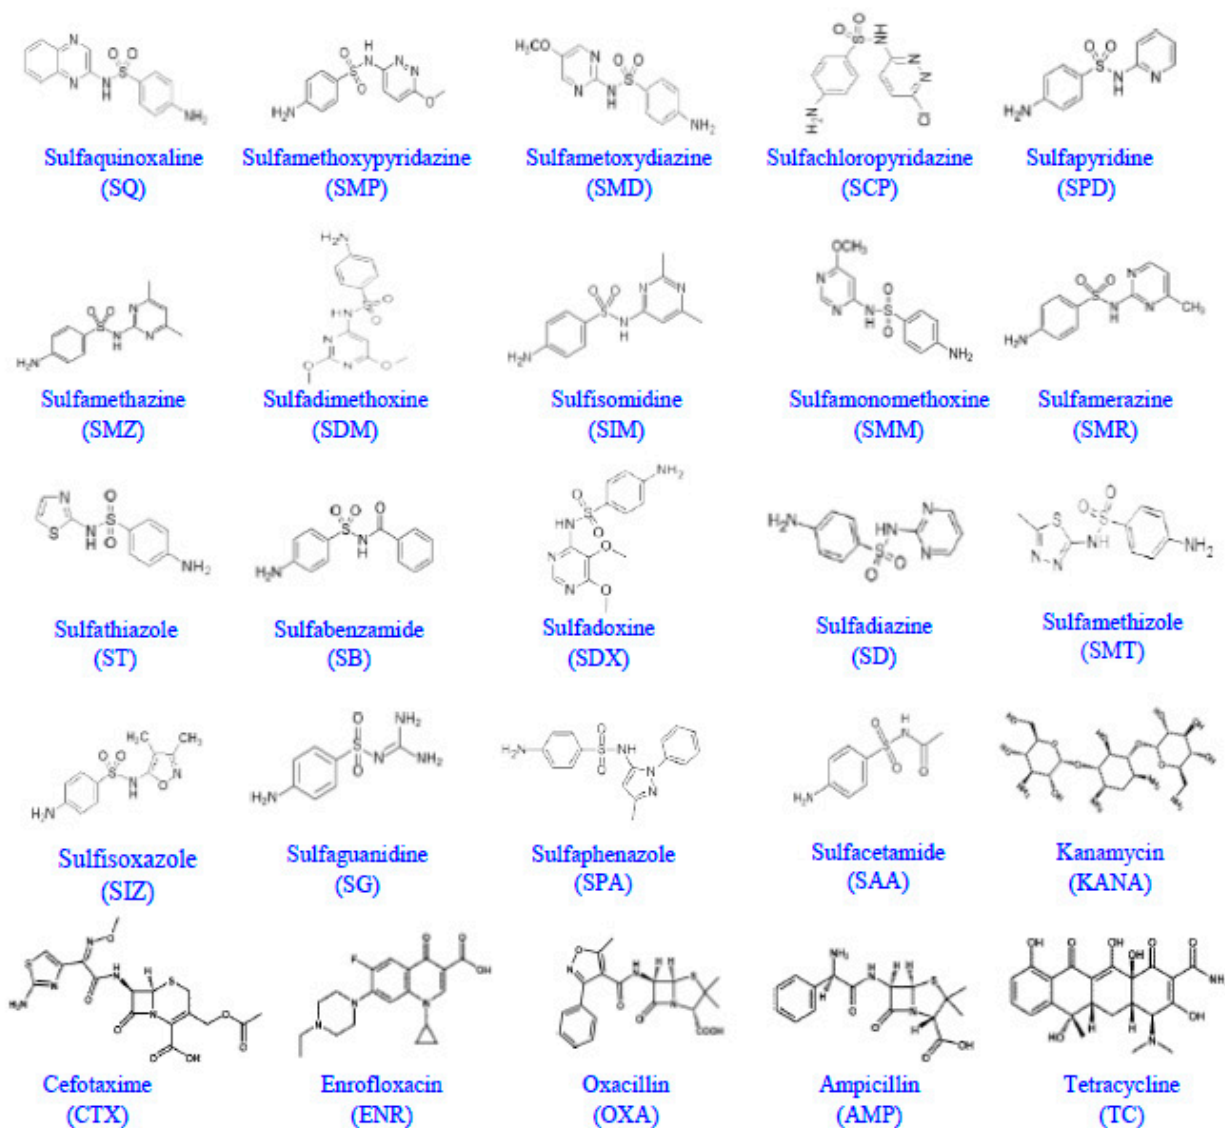

**Figure S1:** The full names, abbreviations and chemical structures of the 19 commonly used sulfonamides and 6 other antibiotics.

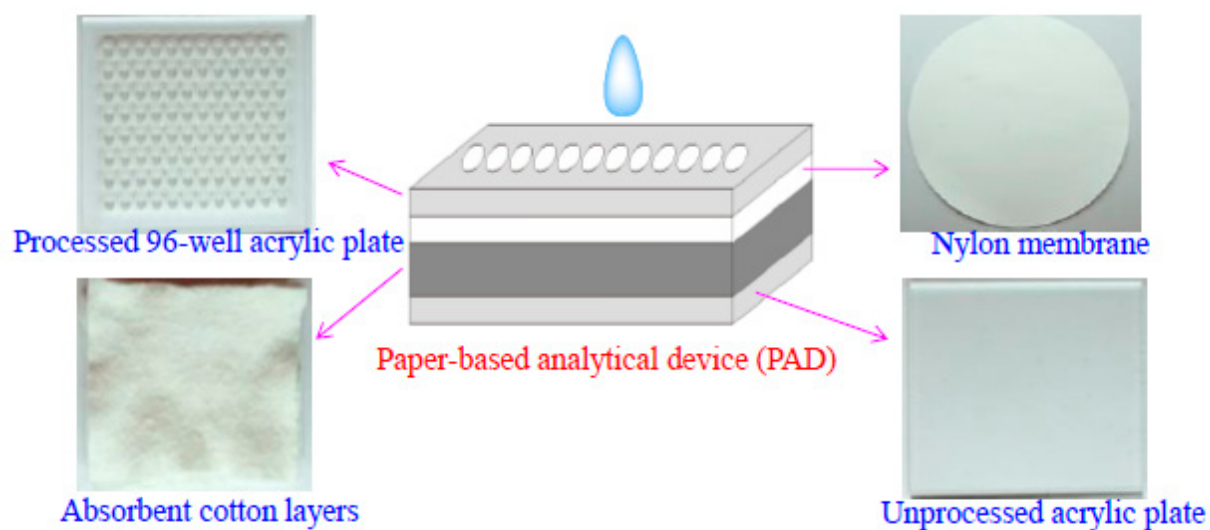

**Figure S2:** Structure of the paper-based analytical device (PAD).

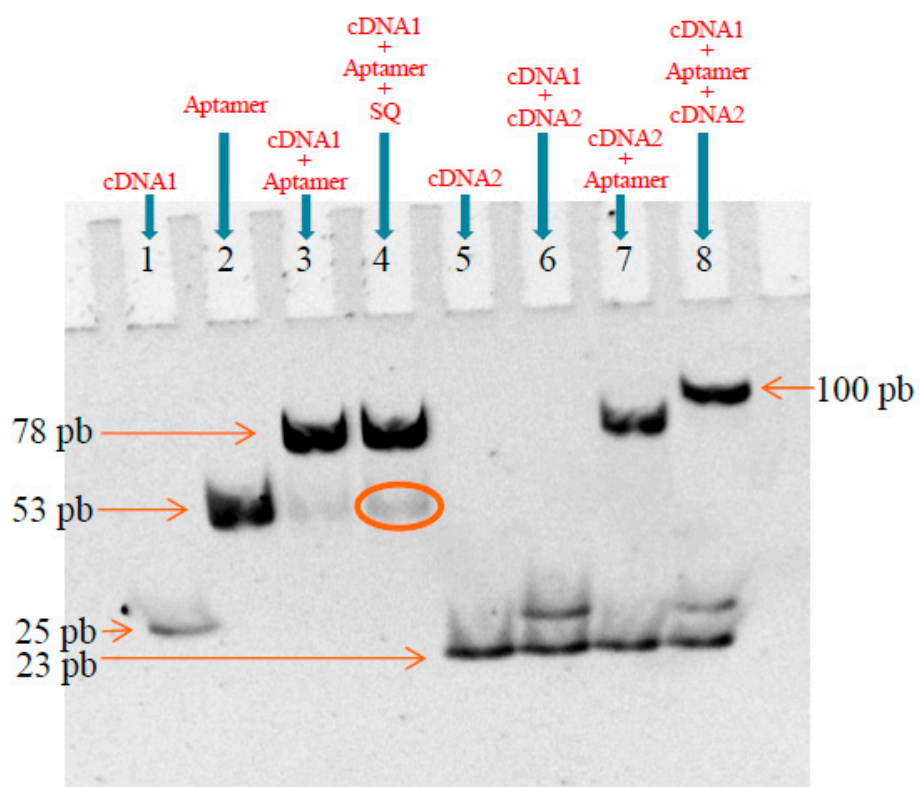

**Figure S3:** Polyacrylamide gel electrophoresis analysis of different DNA complexes. The concentrations of aptamer, cDNA1, cDNA 2 are all 500 nM, and the concentration of SQ is 2.0  $\mu$ M.

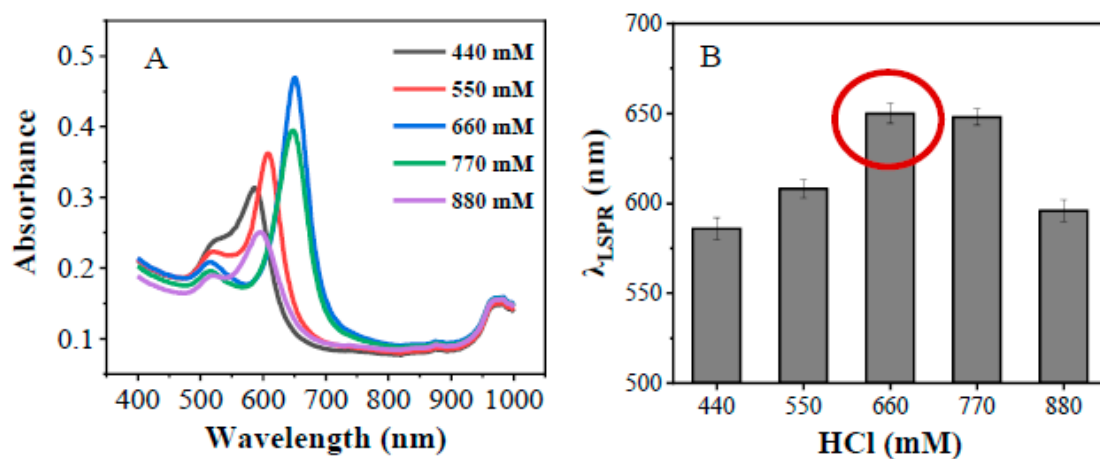

**Figure S4:** (A) Effect of the HCl concentration on NADH-AA-mediated AuNBPs growth system on the extinction spectra, (B) the wavelength of longitudinal LSPR peaks ( $\lambda_{LSPR}$ ) of the generated AuNBPs.

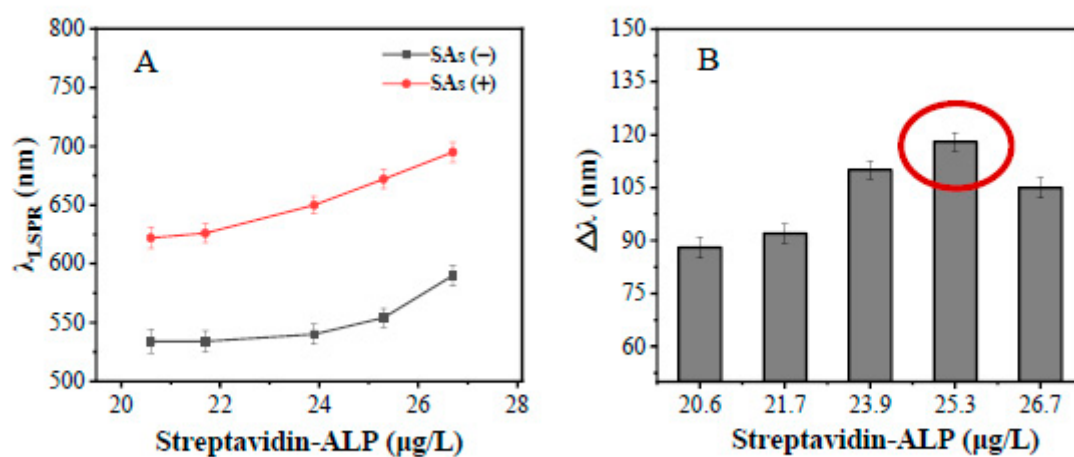

**Figure S5:** Effect of the streptavidin-ALP concentration in the competitive aptamer-binding system (A) on the  $\lambda_{LSPR}$  of the generated AuNBPs and (B) the  $\Delta\lambda_{LSPR}$  of the multicolor colorimetric aptasensor for detecting SQ.

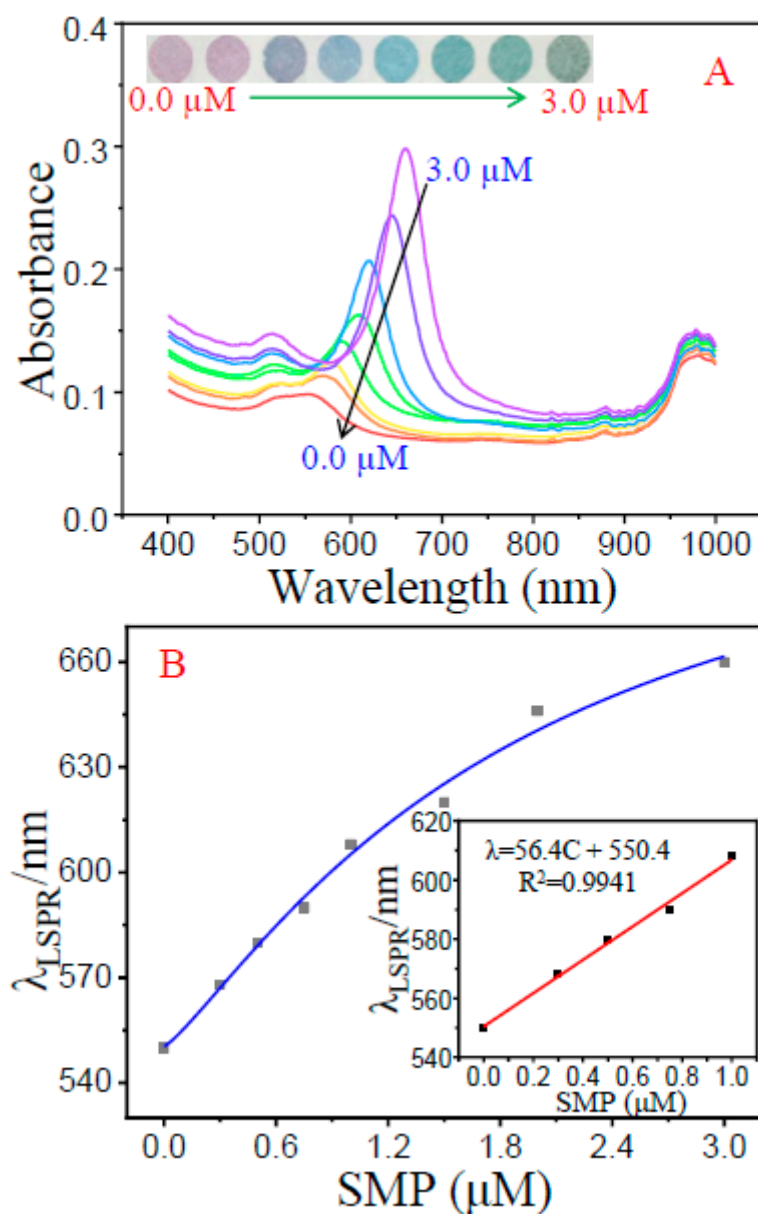

**Figure S6:** The photographs and UV-vis extinction spectra (A) of multicolor colorimetric aptasensor for detecting different concentrations of SMP (0.0, 0.3, 0.5, 0.75, 1.0, 1.5, 2.0 and 3.0  $\mu\text{M}$ ), and (B) the variation of the  $\lambda_{\text{LSPR}}$  of AuNBPs versus SMP concentrations. The insert in (B) is the linear relationship between the  $\lambda_{\text{LSPR}}$  of AuNBPs and SMP concentrations in the range of 0.0–1.0  $\mu\text{M}$ .

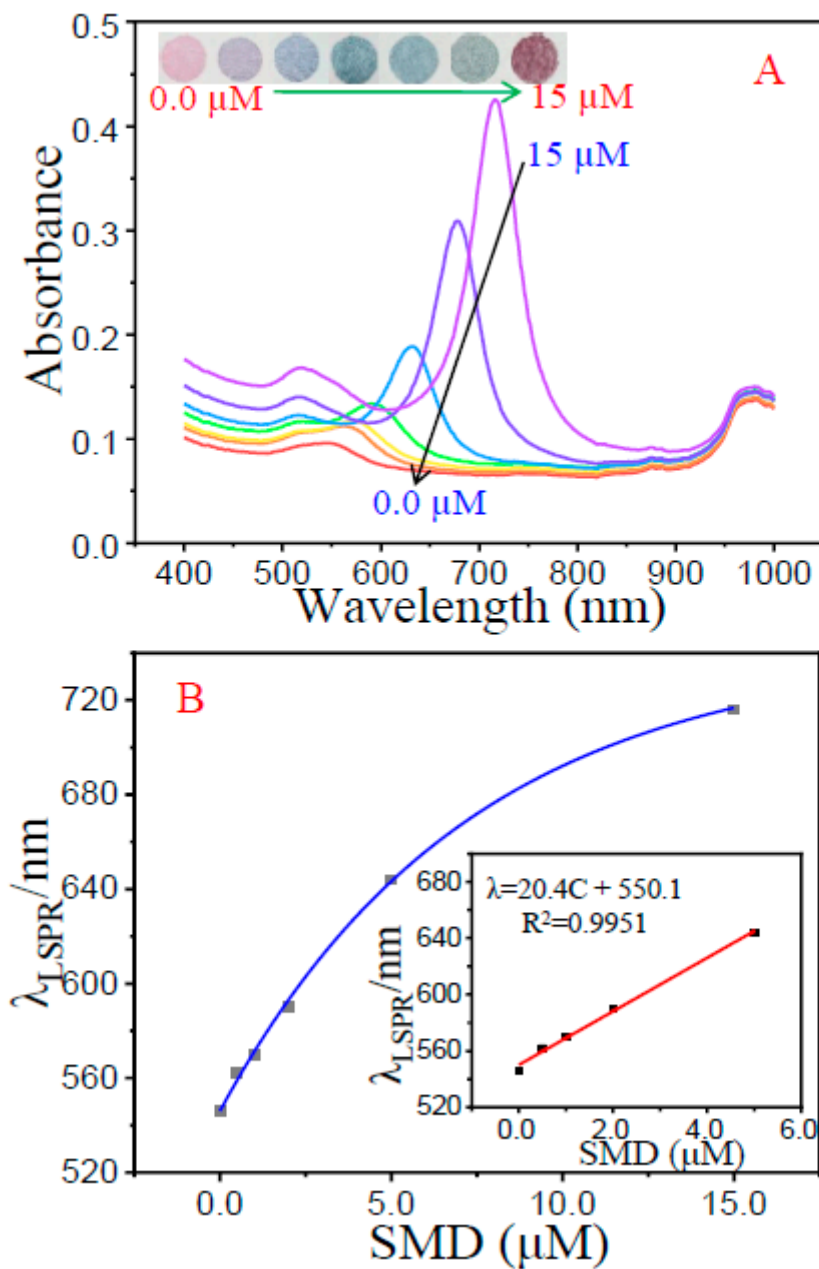

**Figure S7:** The photographs and UV-vis extinction spectra (A) of multicolor colorimetric aptasensor for detecting different concentrations of SMD (0.0, 0.5, 1.0, 2.0, 5.0, 8.0 and 15  $\mu\text{M}$ ), and (B) the variation of the  $\lambda_{\text{LSPR}}$  of AuNBPs versus SMD concentrations. The insert in (B) is the linear relationship between the  $\lambda_{\text{LSPR}}$  of AuNBPs and SMD concentrations in the range of 0.0–5.0  $\mu\text{M}$ .
