# Supplementary material for: A Paper-Based Multicolor Colorimetric Aptasensor for the Visual Determination of Multiple Sulfonamides Based on Aptamer-Functionalized Magnetic Beads and NADH–Ascorbic Acid-Mediated Gold Nanobipyramids
Source: MDPI journal article supplement (doi:10.3390/chemosensors11070386), 2023-07-09
Supplement: s1 [file s1]

Archive with 1 entries (1 files):
- chemosensors-2471230-supplementary.pdf
